# Supplementary figures and images for: Ecological Networks in Stored Grain: Key Postharvest Nodes for Emerging Pests, Pathogens, and Mycotoxins
Source: Oxford University Press journal article supplement (doi:10.1093/biosci/biv122), 2015-09-09

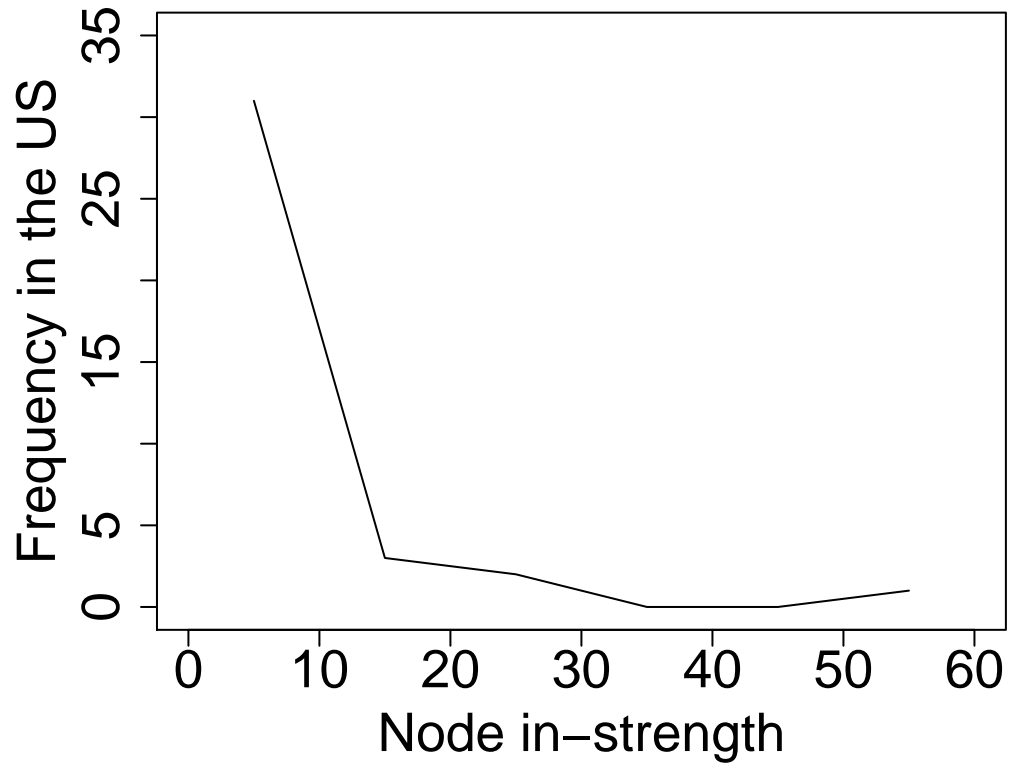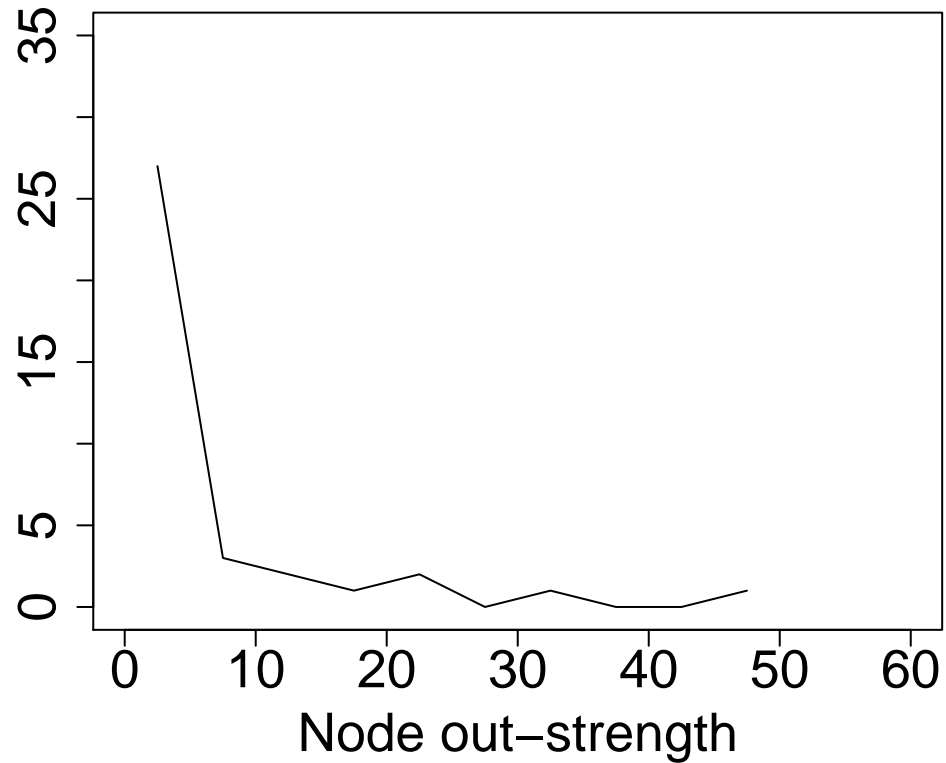

Supplement: biv122_Supplementary_Data.zip [file biv122_Supplementary_Data.zip]

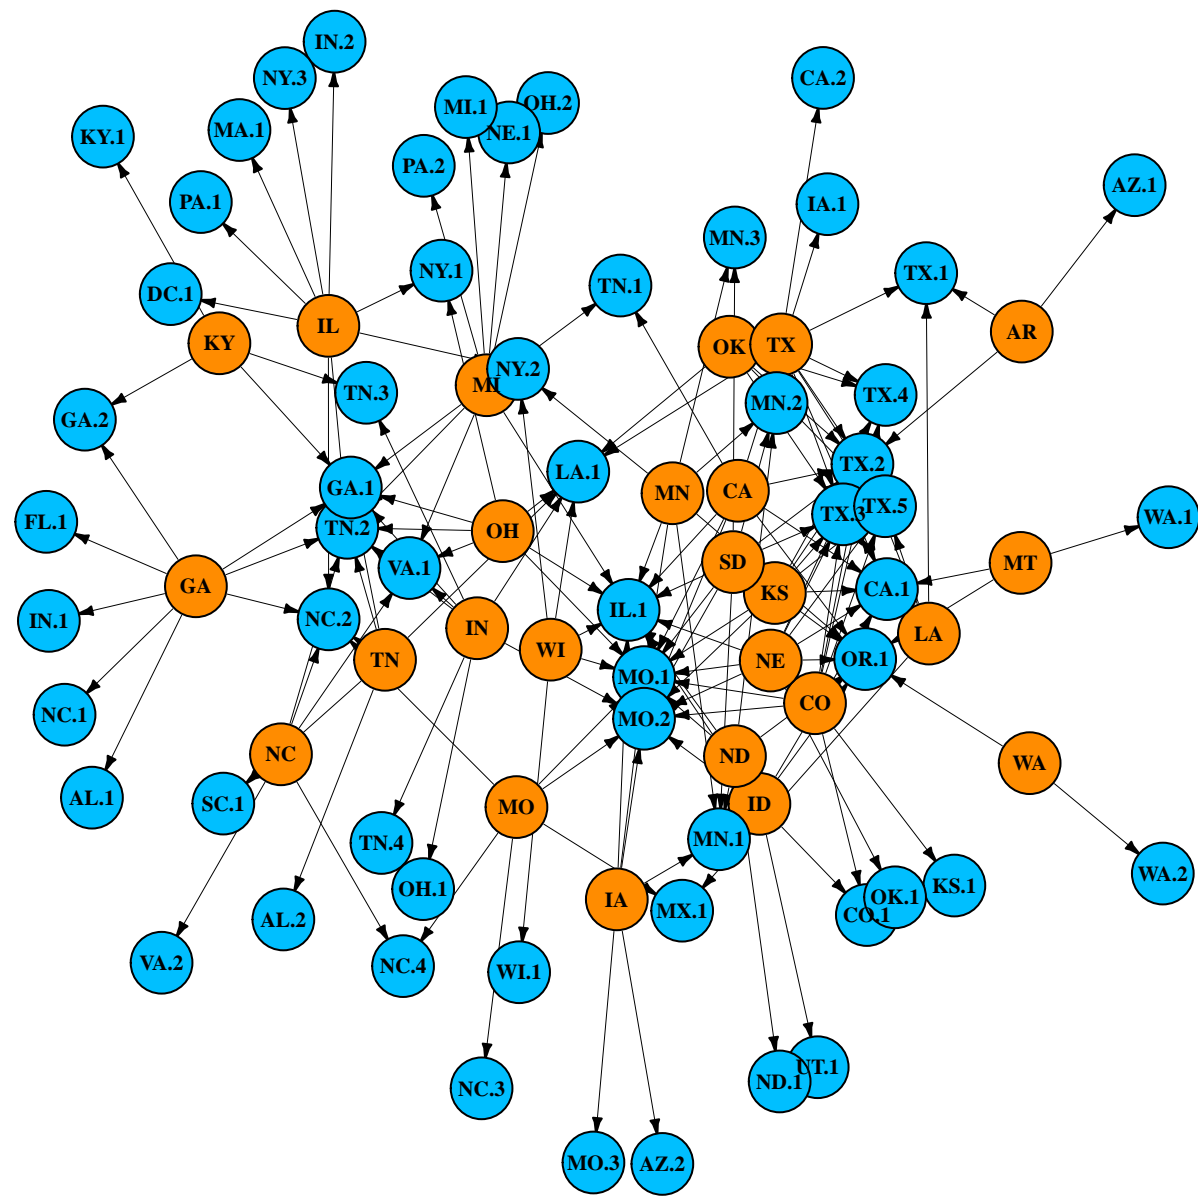

Supplement: biv122_Supplementary_Data.zip [file biv122_Supplementary_Data.zip]

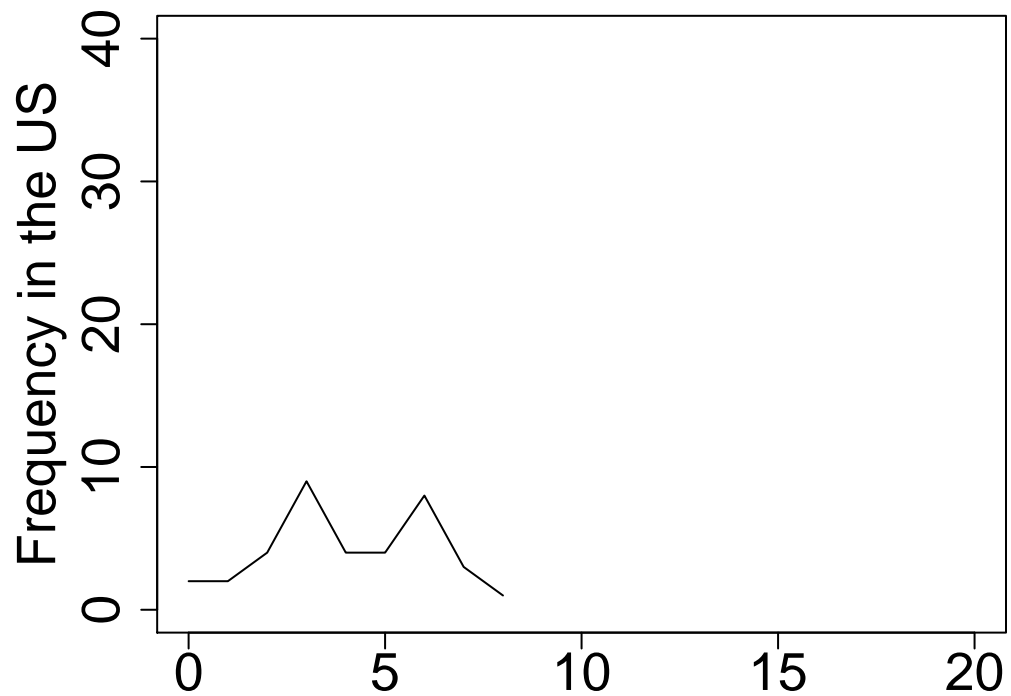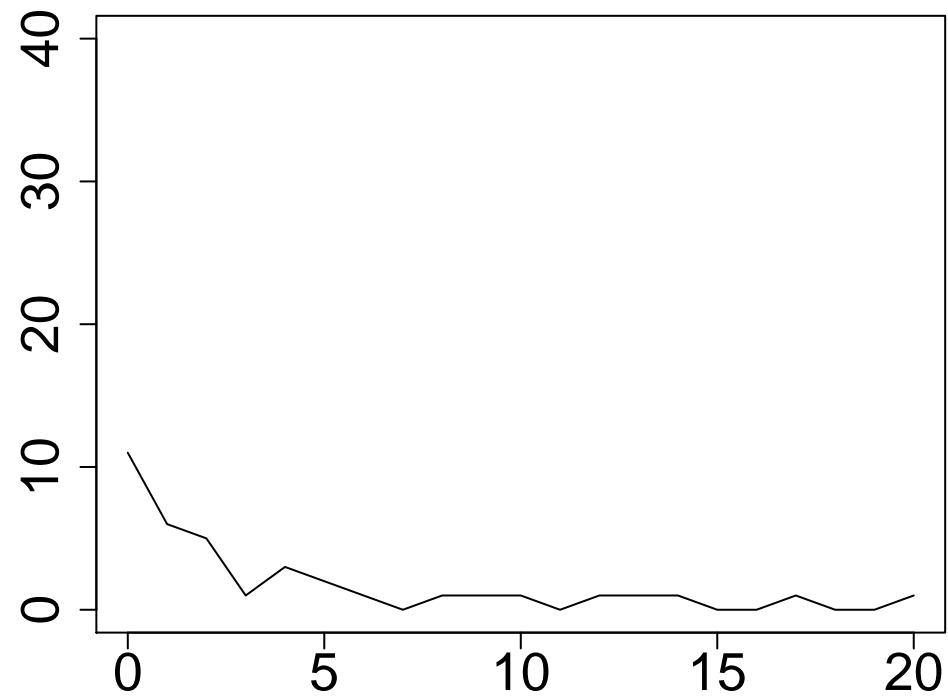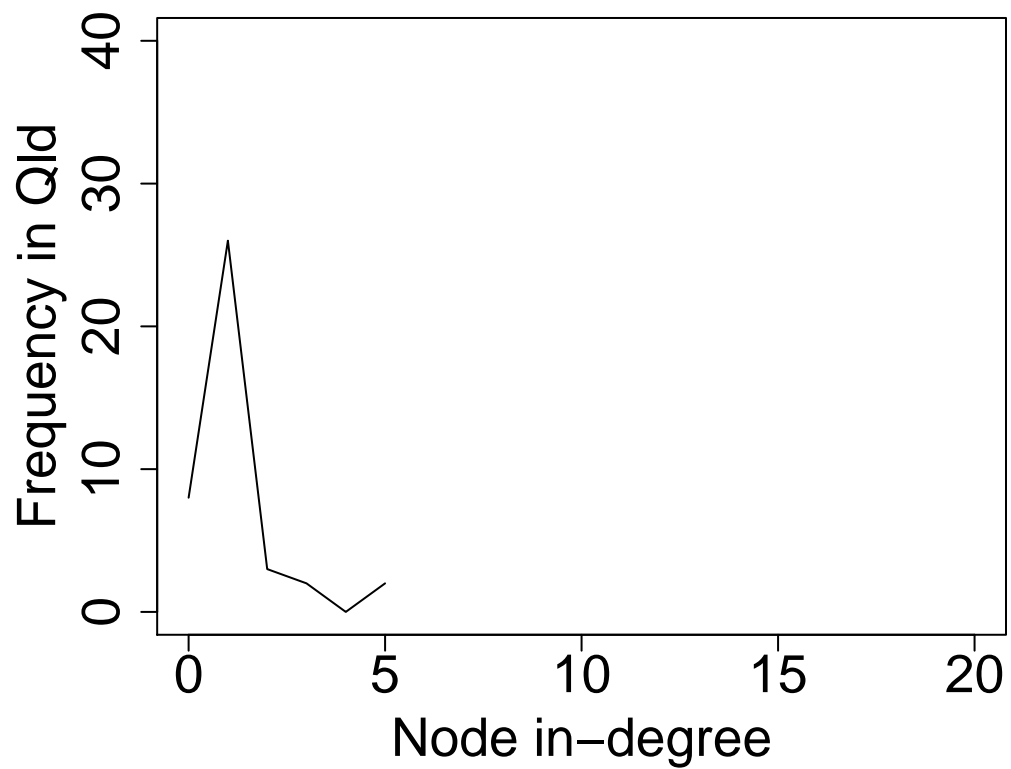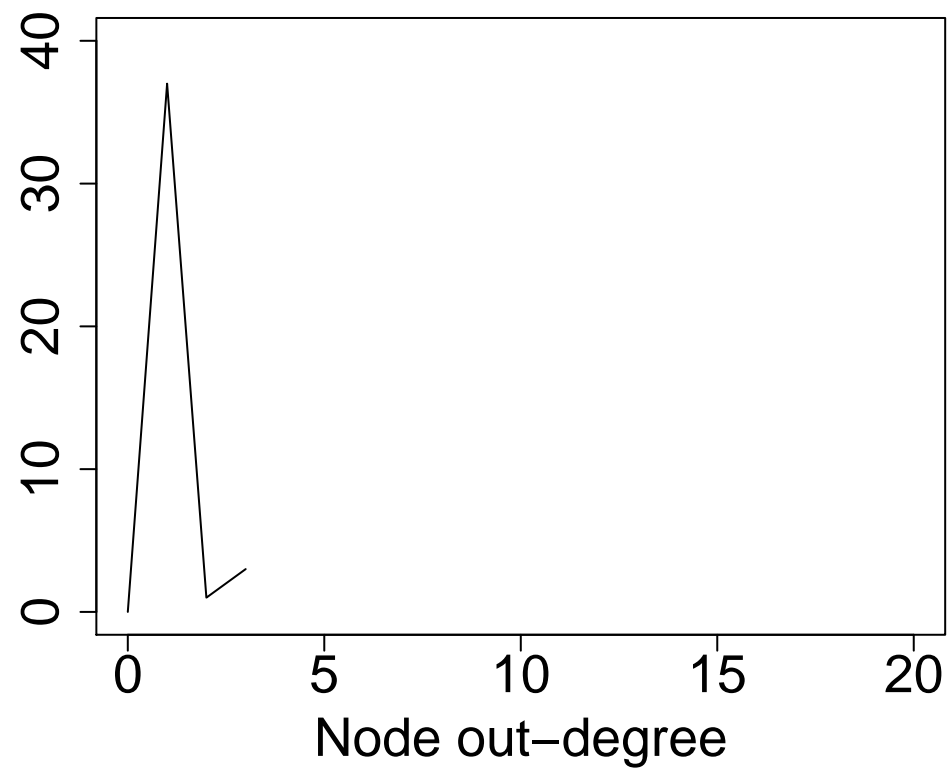

Supplement: biv122_Supplementary_Data.zip [file biv122_Supplementary_Data.zip]

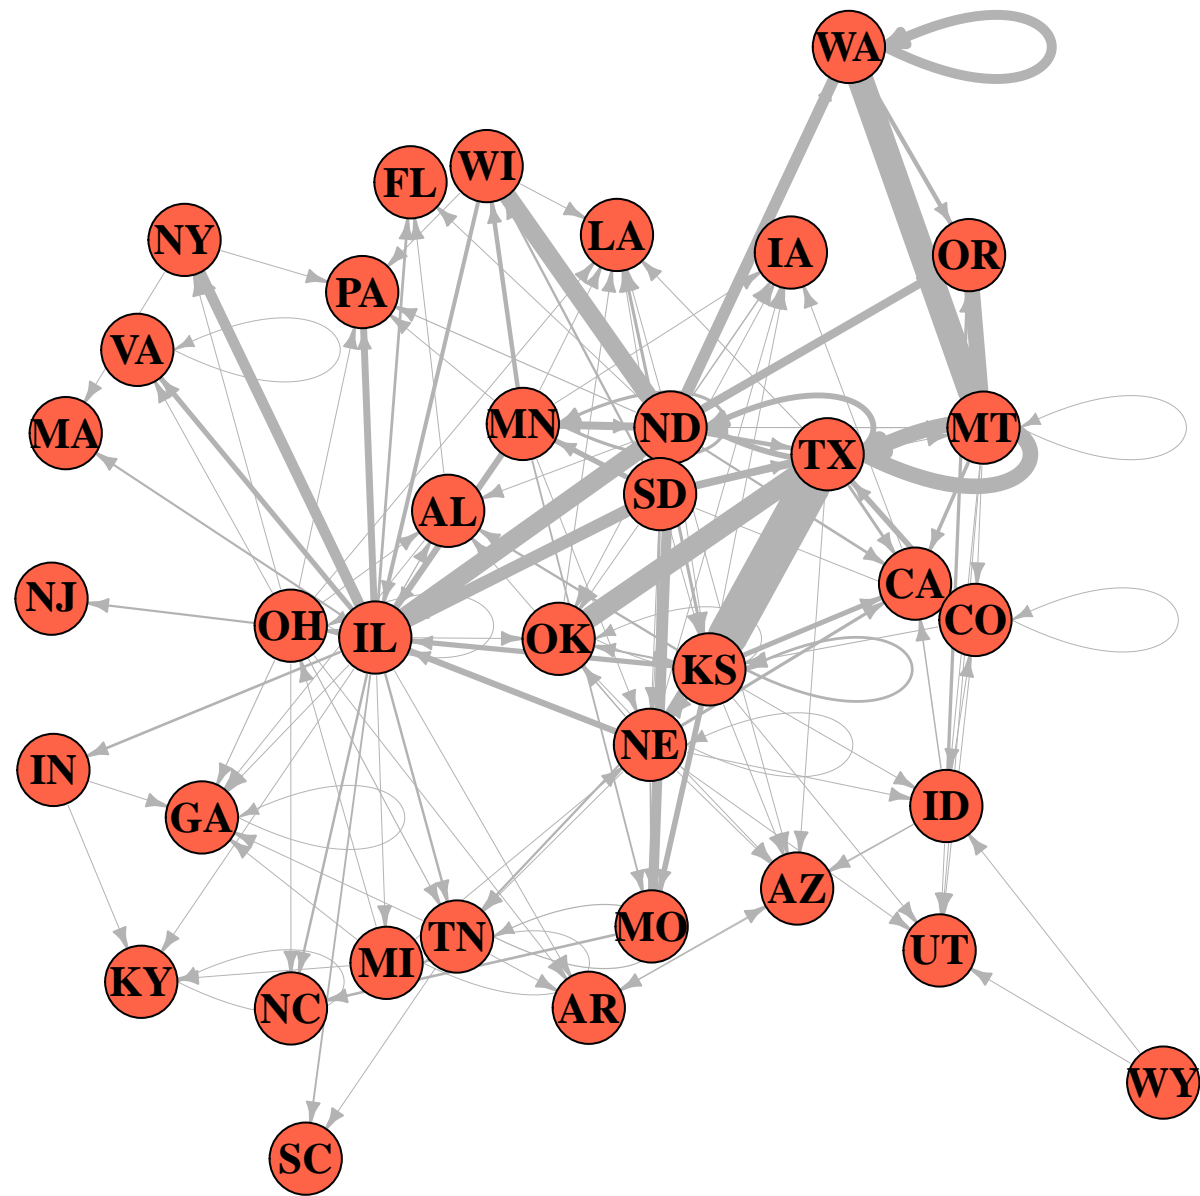

Supplement: biv122_Supplementary_Data.zip [file biv122_Supplementary_Data.zip]
